# Supplementary material
Source: PubMed Central journal article supplement (PMC3901571)
Supplement: NIHMS508161-supplement-2.pdf [file NIHMS508161-supplement-2.pdf]

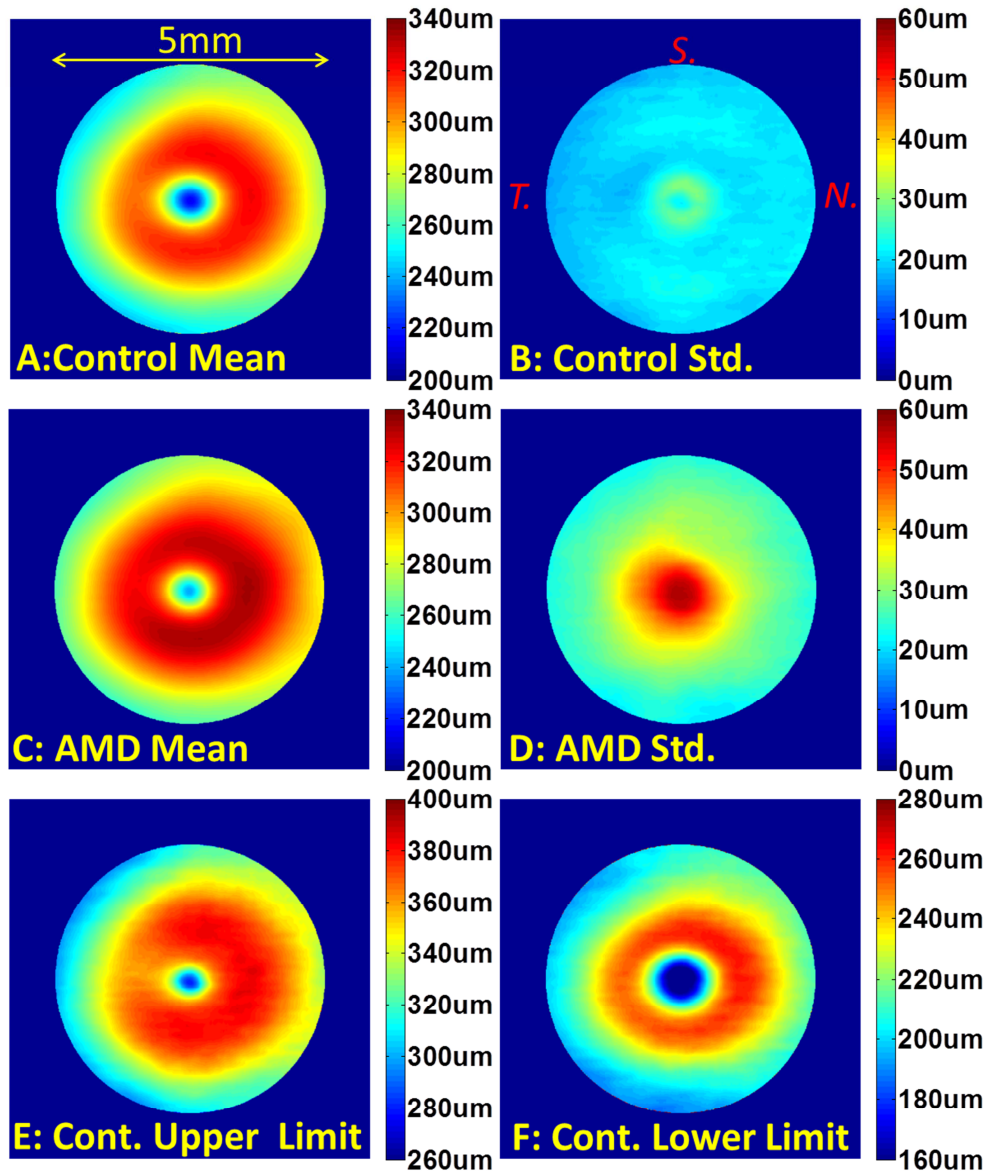

**Figure 4:** Statistical analysis of total retina (TR) thickness maps centered at the fovea.

**A)** Mean TR thickness map for 115 control subjects. **B)** Standard deviation TR thickness map for 115 control subjects. **C)** Mean TR thickness map for 269 age-related macular degeneration (AMD) subjects. **D)** Standard deviation TR thickness map for 269 AMD subjects. **E)** Upper limit TR thickness map (Fig. 5A + 3×Fig. 5B) for control subjects. **F)** Lower limit TR thickness map (Fig. 5A - 3 × Fig. 5B) for control subjects.
