# Supplementary material
Source: PubMed Central journal article supplement (PMC3901571)
Supplement: NIHMS508161-supplement-4.pdf [file NIHMS508161-supplement-4.pdf]

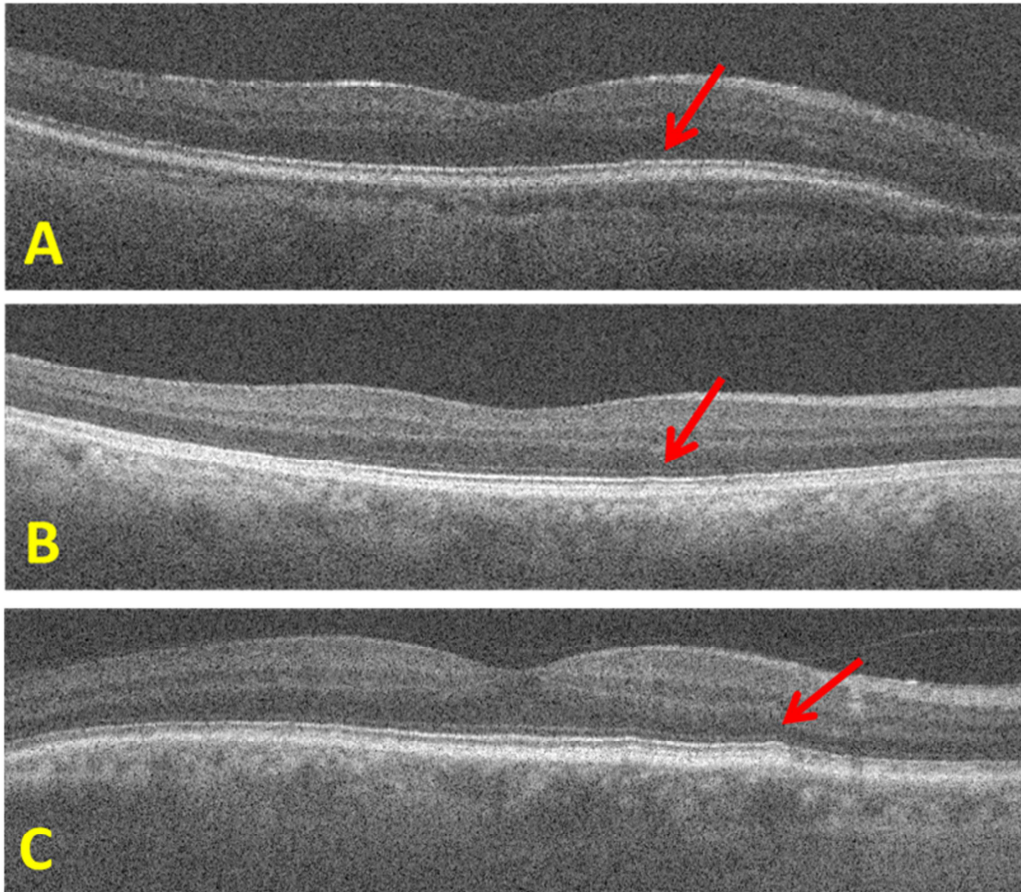

**Figure 10: A,B)** Example B-scans from the two age-related macular degeneration (AMD) subjects with abnormal the retinal pigment epithelium and drusen complex (RPEDC) thickness and thinness scores of zero. The red arrows point to the most prominent possible drusen material found in these subjects. **C)** A rare example B-scan from a control subject where the RPEDC contains a small drusen without macular drusen detected on color fundus photograph. These findings exemplify the main limitation of this study, where the gold standard for classifying subjects into control and AMD eyes was determined by fundus examination and color fundus photography.
