# Supplementary material
Source: PubMed Central journal article supplement (PMC3901571)
Supplement: NIHMS508161-supplement-5.pdf [file NIHMS508161-supplement-5.pdf]

## **AREDS2 Ancillary SDOCT Study Group**

The Age Related Eye Disease Study 2 (AREDS2) Ancillary SDOCT Study Group includes the following:

Cynthia A. Toth<sup>1,2</sup>, Wai Wong<sup>3</sup>, Thomas Huang<sup>4</sup>, G. Baker Hubbard<sup>5</sup>, Sunil Srivastava<sup>5, 6</sup>, Michelle McCall<sup>1</sup>, Katrina Winter<sup>1</sup>, Neeru Sarin<sup>1</sup>, Katherine Schmel<sup>3</sup>, Patti McCollum<sup>4</sup>, Linda Curtis<sup>5</sup>, Stefanie Schuman<sup>1</sup>, Sina Farsiu<sup>1</sup>, Laura Clark<sup>1</sup>, Du Tran-Viet<sup>1</sup>, Francisco Folgar<sup>1</sup>, Eric Yuan<sup>1</sup>, Traci Clemons<sup>7</sup>, Molly Harrington<sup>7</sup>, Emily Chew<sup>3, 8</sup>

1. Duke Eye Center, 2. AREDS2 Ancillary SDOCT Study Chair, 3. National Eye Institute, 4. Devers Eye Center, 5. Emory Eye Center, 6. Cole Eye Institute, 7. EMMES Corporation, 8. AREDS2 Chair
